# Supplementary material for: HIV and lower risk of multiple sclerosis: beginning to unravel a mystery using a record-linked database study
Source: PubMed Central journal article supplement — J Neurol Neurosurg Psychiatry. 2014 Aug 4;86(1):9–12. doi: 10.1136/jnnp-2014-307932 (PMC4283699; doi:10.1136/jnnp-2014-307932), 2014-08-04
Supplement: jnnp-2014-307932-s2.pdf [file jnnp-2014-307932-s2.pdf]

Appendix table: distribution of the HIV cohort and reference cohort, by age, sex, year of cohort entry, Government office region of residence, and IMD score in quintiles

| <b>Age (years)</b>                           | <b>HIV cohort</b> |                   | <b>Reference cohort</b> |                   |
|----------------------------------------------|-------------------|-------------------|-------------------------|-------------------|
|                                              | <b>N</b>          | <b>% of total</b> | <b>N</b>                | <b>% of total</b> |
| 0-4                                          | 139               | 0.7               | 112355                  | 2.1               |
| 5-9                                          | 168               | 0.8               | 145618                  | 2.7               |
| 10-14                                        | 138               | 0.7               | 113372                  | 2.1               |
| 15-19                                        | 173               | 0.8               | 166198                  | 3.1               |
| 20-24                                        | 653               | 3.1               | 200079                  | 3.8               |
| 25-29                                        | 2136              | 10.1              | 264771                  | 5                 |
| 30-34                                        | 4066              | 19.2              | 377462                  | 7.1               |
| 35-39                                        | 4792              | 22.6              | 444962                  | 8.4               |
| 40-44                                        | 3701              | 17.5              | 390356                  | 7.4               |
| 45-49                                        | 2228              | 10.5              | 329573                  | 6.2               |
| 50-54                                        | 1293              | 6.1               | 345117                  | 6.5               |
| 55-59                                        | 776               | 3.7               | 375702                  | 7.1               |
| 60-64                                        | 480               | 2.3               | 377503                  | 7.1               |
| 65-69                                        | 274               | 1.3               | 387109                  | 7.3               |
| 70-74                                        | 98                | 0.5               | 397229                  | 7.5               |
| 75-79                                        | 37                | 0.2               | 385998                  | 7.3               |
| 80-84                                        | 22                | 0.1               | 282933                  | 5.3               |
| 85+                                          | 33                | 0.2               | 202159                  | 3.8               |
| <b>Sex</b>                                   |                   |                   |                         |                   |
| Male                                         | 14799             | 69.8              | 2667741                 | 50.3              |
| Female                                       | 6408              | 30.2              | 2630755                 | 49.7              |
| <b>Year of cohort entry</b>                  |                   |                   |                         |                   |
| 1999                                         | 2355              | 11.1              | 629145                  | 11.9              |
| 2000                                         | 1650              | 7.8               | 580046                  | 10.9              |
| 2001                                         | 1509              | 7.1               | 541347                  | 10.2              |
| 2002                                         | 1946              | 9.2               | 530489                  | 10                |
| 2003                                         | 2097              | 9.9               | 539918                  | 10.2              |
| 2004                                         | 2454              | 11.6              | 527297                  | 10                |
| 2005                                         | 2471              | 11.7              | 496994                  | 9.4               |
| 2006                                         | 2798              | 13.2              | 472465                  | 8.9               |
| 2007                                         | 2889              | 13.6              | 484195                  | 9.1               |
| 2008                                         | 1038              | 4.9               | 496600                  | 9.4               |
| <b>Government office region of residence</b> |                   |                   |                         |                   |
| North East                                   | 604               | 2.8               | 336934                  | 6.4               |
| North West                                   | 2177              | 10.3              | 813517                  | 15.4              |
| Yorshire and The Humber                      | 1043              | 4.9               | 550812                  | 10.4              |
| East Midlands                                | 530               | 2.5               | 423886                  | 8                 |

|                  |       |      |         |      |
|------------------|-------|------|---------|------|
| West Midlands    | 1050  | 5    | 566552  | 10.7 |
| East of England  | 1062  | 5    | 576729  | 10.9 |
| London           | 11771 | 55.5 | 610704  | 11.5 |
| South East       | 2138  | 10.1 | 799742  | 15.1 |
| South West       | 832   | 3.9  | 619620  | 11.7 |
| <b>IMD score</b> |       |      |         |      |
| I                | 1215  | 5.7  | 762286  | 14.4 |
| II               | 1674  | 7.9  | 871938  | 16.5 |
| III              | 1908  | 9    | 862085  | 16.3 |
| IV               | 4901  | 23.1 | 1108249 | 20.9 |
| V                | 11509 | 54.3 | 1693938 | 32   |
| <hr/>            |       |      |         |      |
| Total            | 21207 | 100  | 5298496 | 100  |
| <hr/>            |       |      |         |      |
